## Comparison of clinical outcomes after transcatheter and transsubclavian versus transfemoral TAVI: a propensity-matched analysis

A. Villecourt, L. Faroux, A. Muneaux, S. Tassan-Mangina, V. Heroguelle, A. Poncet, P. Nazeyrollas, V.G. Ruggieri, D. Metz

University Hospital of Reims, Reims, France

**Funding Acknowledgement:** Type of funding source: None

Transcatheter (TC) and transsubclavian (TSc) accesses are increasingly used as alternative approaches for TAVI when the transfemoral (TF) access is not suitable. However, concerns remain about the risk of peri-procedural stroke and long-term outcomes following TC or TSc TAVI.

The present study sought to compare early- and long-term outcomes of TC/TSc vs. TF TAVI after propensity-score matching.

260 patients who underwent TAVI through a TF (n=220), TC (n=32) or TSc (n=8) approach at our institution during a 4 years period were identified. A 1:1 matching based on the propensity-score was performed, leading to a population of 40 TF and 40 TC/TSc. Primary endpoints were early complications whereas secondary endpoints were long-term outcomes.

There was no difference in the baseline characteristics. At 30-day post-TAVI, there was no difference in mortality and stroke rates between TF and TC/TSc TAVI (5% vs. 5% mortality,  $p=1.0$  and 2 vs. 1 stroke,  $p=1.0$ ). After a median follow-up of 21 months, the risk of death ( $p=0.950$ ), stroke ( $p=0.817$ ) and myocardial infarction ( $p=0.155$ ) did not differ between the 2 groups.

After propensity-score matching, no significant difference in early and long-term outcomes was observed between TF and TSc/TSc TAVI. These findings should encourage Heart-Teams to consider a TC or TSc approach when TF access is not available.

Table 1. 30-day and 1-year outcomes according to the arterial access (TF vs. TC/TSc)

| Variables                                | TF-TAVI (n=40) | TC/TSc-TAVI (n=40) | p-value |
|------------------------------------------|----------------|--------------------|---------|
| <b>30-day outcomes</b>                   |                |                    |         |
| All-cause mortality                      | 2 (5.0)        | 2 (5.0)            | 1.000   |
| All-stroke                               | 2 (5.0)        | 1 (2.5)            | 1.000   |
| Life-threatening bleeding                | 4 (10.0)       | 1 (2.5)            | 0.375   |
| Acute kidney injury stage 2 or 3         | 2 (5.0)        | 1 (2.5)            | 1.000   |
| Major vascular complication              | 6 (15.0)       | 6 (15.0)           | 1.000   |
| Coronary obstruction                     | 0              | 0                  | –       |
| Early safety composite endpoint (VARC-2) | 10 (25.0)      | 8 (20.0)           | 0.804   |
| <b>1-year outcomes</b>                   |                |                    |         |
| All-cause mortality                      | 6 (15.0)       | 7 (17.5)           | 1.000   |
| Cardiovascular mortality                 | 5 (12.5)       | 3 (7.5)            | 0.727   |
| Stroke                                   | 3 (7.5)        | 2 (5.0)            | 1.000   |
| Myocardial infarction                    | 0 (0)          | 2 (5)              | 0.500   |
| MACCE                                    | 8 (20.0)       | 9 (22.5)           | 1.000   |
| Readmission for heart failure            | 6 (15.0)       | 2 (5)              | 0.219   |

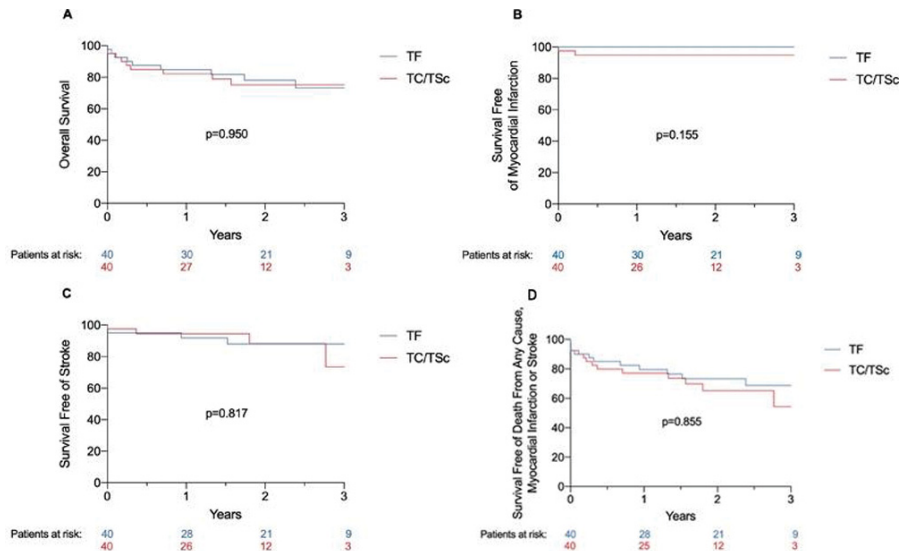

Figure: Kaplan-Meier Analysis for Overall Survival (A), Myocardial Infarction (B), Stroke (C) and MACCE (D) according to the arterial access (Transfemoral (TF) vs. Transcatheter (TC)/Transsubclavian (TSc))

Figure 1
